# Supplementary material
Source: MDPI journal article supplement (https://www.mdpi.com/2311-7524/10/1/89)
Supplement: s1 [file s1]

## Supplementary data legends

**Table S1.** Result of principal component analysis among studied traits in Ginkgo seedlings under low NaCl stress. An asterisk indicates significant differences at  $P < 0.05$ . Pn, photosynthetic rate; Tr, transpiration rate; Ci, intercellular CO<sub>2</sub> concentration ;Gs, stomatal conductance;ETR, photosynthetic electron transport rate;Fo, minimal fluorescence; NPQ, non-photochemical quenching coefficient; Y(II),effective photochemical quantum yield of PSII; qP, photochemical quenching coefficient; Fv/Fm, potential efficiency of primary conversion of light energy of PSII;MDA, malonic dialdehyde; EL, electrolyte leakage; POD, peroxidase; SOD, superoxide dismutase; Pro, proline content; SP, soluble protein content; SS,soluble sugar content; RWC, relative water content ; Fla, flavonoid content; Chla,Chla content; Chlb,Chlb content; Chla+Chlb,Chla+Chlb content.

| Principal component       |           | 1        | 2        | 3        | 4        | 5        | 6        |
|---------------------------|-----------|----------|----------|----------|----------|----------|----------|
| Eigenvector of each trait | Pn        | 0.23193  | 0.26011  | -0.20303 | -0.1272  | -0.11107 | 0.31139  |
|                           | Tr        | 0.33543  | 0.2322   | -0.05459 | 0.0927   | 0.12764  | 0.00662  |
|                           | Ci        | 0.32533  | 0.18896  | 0.0649   | 0.06309  | 0.11053  | -0.32882 |
|                           | Gs        | 0.32483  | 0.1349   | -0.06068 | -0.01096 | 0.26774  | -0.19555 |
|                           | ETR       | 0.14363  | -0.19679 | 0.30137  | -0.00229 | -0.27638 | 0.21296  |
|                           | Fo        | 0.10982  | 0.10169  | 0.15202  | 0.39665  | 0.30433  | 0.20886  |
|                           | NPQ       | -0.1292  | -0.02673 | -0.38293 | 0.0286   | -0.03472 | -0.12506 |
|                           | Y(II)     | 0.19852  | -0.19715 | 0.37805  | 0.04772  | -0.1379  | 0.03962  |
|                           | qP        | 0.0892   | -0.20917 | 0.40797  | 0.08898  | -0.12063 | 0.15817  |
|                           | Fv/Fm     | 0.29166  | -0.02435 | -0.09103 | -0.24499 | -0.3227  | 0.25722  |
|                           | MDA       | 0.04473  | 0.22043  | -0.23208 | 0.20641  | -0.41125 | 0.32576  |
|                           | EL        | -0.20983 | -0.04506 | 0.0617   | 0.45283  | -0.15072 | -0.19164 |
|                           | POD       | -0.06152 | -0.12482 | -0.02921 | 0.41229  | 0.36229  | 0.44653  |
|                           | SOD       | 0.30785  | 0.0454   | -0.12811 | 0.26236  | 0.01373  | -0.03598 |
|                           | Pro       | 0.13344  | 0.19511  | 0.25552  | 0.12576  | -0.27015 | -0.23287 |
|                           | SP        | 0.21177  | -0.25624 | -0.01155 | -0.08406 | 0.28445  | 0.14631  |
|                           | SS        | 0.07218  | -0.28963 | -0.12681 | -0.31658 | 0.19509  | 0.16159  |
|                           | RWC       | 0.33339  | 0.11647  | 0.15212  | -0.14867 | 0.09965  | -0.07075 |
|                           | Fla       | 0.0835   | -0.39711 | 0.01928  | -0.01238 | 6.52E-04 | -0.29108 |
|                           | Chla      | -0.20431 | 0.24902  | 0.27528  | -0.23461 | 0.16505  | 0.10914  |
|                           | Chlb      | -0.20489 | 0.248    | 0.27868  | -0.23448 | 0.16047  | 0.10077  |
|                           | Chla+Chlb | -0.16197 | 0.37534  | 0.19053  | -0.02981 | 0.03736  | 0.04688  |
| Eigenvalue                |           | 5.33936  | 4.69171  | 3.32796  | 2.6529   | 1.38301  | 1.03533  |
| Contribution rate         |           | 24.2698  | 21.32595 | 15.1271  | 12.05865 | 6.28639  | 4.70606  |

**Table S2.** Result of principal component analysis among studied traits in Ginkgo seedlings under medium NaCl stress. An asterisk indicates significant differences at  $P < 0.05$ . Pn, photosynthetic rate; Tr, transpiration rate;Ci, intercellular CO<sub>2</sub> concentration ;Gs, stomatal conductance; ETR, photosynthetic electron transport rate;Fo, minimal fluorescence; NPQ, non-photochemical quenching coefficient; Y(II),effective photochemical quantum yield of PSII;qP, photochemical quenching coefficient; Fv/Fm, potential efficiency of primary conversion of light

energy of PSII;MDA, malonic dialdehyde; EL, electrolyte leakage;POD, peroxidase; SOD, superoxide dismutase; Pro, free proline content; SP, soluble protein content; SS, soluble sugar content; RWC, relative water content ; Fla, flavonoid content; Chla, Chla content; Chlb, Chlb content;Chla+Chlb,Chla+Chlb content.

| Principal component       |           | 1        | 2        | 3        | 4        | 5        | 6        |
|---------------------------|-----------|----------|----------|----------|----------|----------|----------|
| Eigenvector of each trait | Pn        | 0.22622  | 0.26927  | -0.05587 | 0.09879  | 0.3392   | -0.17321 |
|                           | Tr        | 0.21349  | 0.34123  | -0.00975 | 0.23332  | -0.0286  | -0.10509 |
|                           | Ci        | 0.191    | 0.32456  | 0.07908  | 0.16585  | -0.24284 | -0.07762 |
|                           | Gs        | 0.11148  | 0.29461  | 0.20501  | 0.20966  | -0.16988 | 0.06038  |
|                           | ETR       | 0.22467  | -0.19379 | 0.10969  | 0.08932  | 0.13492  | -0.33129 |
|                           | Fo        | -0.09815 | 0.24549  | 0.31294  | 0.19034  | 0.17706  | 0.25639  |
|                           | NPQ       | -0.12022 | 0.33312  | 0.01161  | -0.20579 | 0.01565  | -0.21203 |
|                           | Y(II)     | 0.06344  | -0.30577 | 0.03506  | 0.45279  | 0.14797  | -0.04899 |
|                           | qP        | -0.03291 | -0.24444 | 0.24737  | 0.41575  | 0.12988  | -0.0375  |
|                           | Fv/Fm     | 0.18713  | -0.20159 | -0.33169 | 0.29625  | 0.05728  | 0.06116  |
|                           | MDA       | 0.09605  | -0.2014  | 0.08315  | -0.04751 | -0.35671 | 0.52295  |
|                           | EL        | -0.05428 | -0.17099 | -0.01617 | -0.26822 | -0.24216 | -0.17949 |
|                           | POD       | -0.15742 | 0.11317  | -0.28164 | 0.0184   | 0.42995  | 0.3081   |
|                           | SOD       | 0.10194  | -3.41105 | -0.49666 | 0.05684  | -0.01087 | 0.21739  |
|                           | Pro       | 0.00258  | 0.08624  | 0.39614  | -0.0378  | 0.03249  | 0.00258  |
|                           | SP        | -0.33045 | -0.01031 | -0.00732 | -0.12045 | 0.39053  | -0.33045 |
|                           | SS        | -0.25453 | -0.18308 | 0.26012  | 0.17216  | -0.05588 | -0.25453 |
|                           | RWC       | -0.06235 | 0.25577  | -0.2335  | 0.27451  | -0.18496 | -0.06235 |
|                           | Fla       | -0.34747 | 0.15174  | 0.06164  | 0.03908  | 0.08168  | -0.34747 |
|                           | Chla      | 0.3357   | -0.03591 | 0.16527  | -0.23192 | 0.24873  | 0.3357   |
|                           | Chlb      | 0.34235  | -0.05229 | 0.14618  | -0.19553 | 0.27033  | 0.34235  |
|                           | Chla+Chlb | 0.40472  | 0.01098  | 0.03398  | -0.1411  | 0.03276  | 0.40472  |
| Eigenvalue                |           | 5.38736  | 4.66933  | 3.02717  | 2.2413   | 1.67456  | 1.3268   |
| Contribution rate(%)      |           | 24.48802 | 21.22423 | 13.75988 | 10.18773 | 7.61163  | 6.03089  |

**Table S3.** Result of principal component analysis among studied traits in Ginkgo seedlings under high NaCl stress. An asterisk indicates significant differences at  $P < 0.05$ . Pn,photosynthetic rate;Tr,transpiration rate;Ci,intercellular CO<sub>2</sub> concentration ;Gs,stomatal conductance;ETR,photosynthetic electron transport rate;Fo,minimal fluorescence;NPQ,non-photochemical quenching coefficient;Y(II),effective photochemical quantum yield of PSII;qP,photochemical quenching coefficient;Fv/Fm, potential efficiency of primary conversion of light energy of PSII;MDA, malonic dialdehyde; EL,electrolyte leakage;POD, peroxidase; SOD, superoxide dismutase; Pro,free proline;SP,soluble protein content;SS,soluble sugar content;RWC, relative water content ; Fla,flavonoid content;Chla,Chla content;Chlb,Chlb content;Chla+Chlb,Chla+Chlb content.

| Principal component |    | 1        | 2       | 3       | 4       | 5        | 6        |
|---------------------|----|----------|---------|---------|---------|----------|----------|
|                     | Pn | 0.29432  | 0.21464 | 0.10922 | 0.04478 | -0.18935 | -0.20122 |
|                     | Tr | 0.26741  | 0.23975 | 0.06651 | 0.05787 | -0.33519 | 0.02459  |
|                     | Ci | -0.06145 | -0.1576 | 0.29941 | 0.23938 | -0.37922 | 0.23322  |
|                     | Gs | 0.18653  | 0.12396 | 0.34186 | 0.25663 | -0.17649 | -0.00624 |

|                          |           |          |          |          |          |          |          |
|--------------------------|-----------|----------|----------|----------|----------|----------|----------|
| Eigenvector of eachtrait | ETR       | 0.27942  | 0.23327  | 0.04256  | -0.0579  | 0.19668  | 0.2612   |
|                          | Fo        | 0.20268  | -0.07527 | 0.23797  | -0.21237 | 0.28276  | -0.38905 |
|                          | NPQ       | -0.2456  | -0.11437 | 0.34252  | 0.14602  | -0.00658 | -0.11099 |
|                          | Y(II)     | 0.27138  | 0.19081  | 0.05999  | -0.04877 | 0.19413  | 0.38904  |
|                          | qP        | 0.21943  | -0.05045 | 0.25237  | -0.13846 | 0.39003  | 0.08083  |
|                          | Fv/Fm     | 0.17015  | 0.28355  | -0.15242 | 0.15055  | -0.10295 | 0.32778  |
|                          | MDA       | -0.16431 | -0.23941 | 0.10936  | -0.20262 | -0.05319 | 0.42608  |
|                          | EL        | -0.03997 | -0.23429 | 0.23519  | -0.36873 | -0.20585 | 0.15582  |
|                          | POD       | -0.14126 | 0.28752  | 0.0454   | -0.34358 | 0.22648  | 0.20745  |
|                          | SOD       | -0.05013 | 0.34474  | 0.14777  | -0.23457 | -0.20991 | -0.05677 |
|                          | Pro       | -0.06539 | -0.22605 | -0.1893  | 0.31888  | 0.19273  | 0.33153  |
|                          | SP        | -0.25652 | 0.27501  | -0.07197 | 0.12996  | 0.06178  | 0.00659  |
|                          | SS        | -0.1771  | 0.27487  | -0.31348 | 0.1244   | 0.02707  | -0.15635 |
|                          | RWC       | 0.07157  | -0.01694 | 0.29785  | 0.37395  | 0.37102  | -0.09565 |
|                          | Fla       | -0.16692 | 0.15288  | 0.32463  | 0.31124  | 0.09593  | 0.10569  |
|                          | Chla      | 0.29447  | -0.21586 | -0.20917 | 0.12189  | 0.00813  | -0.00862 |
|                          | Chlb      | 0.29615  | -0.21515 | -0.20523 | 0.12238  | 0.00669  | -0.00137 |
|                          | Chla+Chlb | 0.33639  | -0.17661 | -0.02065 | -0.08257 | -0.16892 | -0.01941 |
| Eigenvalue               |           | 6.2559   | 4.84216  | 2.64188  | 2.12202  | 1.76703  | 1.44108  |
| Contributionrate(%)      |           | 28.43591 | 22.00981 | 12.00853 | 9.64555  | 8.03195  | 6.55037  |
